# Supplementary material
Source: PubMed Central journal article supplement (PMC3349457)
Supplement: supp_111.026955_26955_Tables_1_2.pdf [file supp_111.026955_26955_Tables_1_2.pdf]

Supplemental Table 1. Baseline association of the minor allele at each single nucleotide polymorphism with percentage of calories from fat, protein and carbohydrate<sup>1</sup>.

|                 |                                |                | Age, sex, study site and population stratification adjusted models |                    |
|-----------------|--------------------------------|----------------|--------------------------------------------------------------------|--------------------|
| Closest gene    | Single nucleotide polymorphism | Minor allele   | Beta $\pm$ SE                                                      | P value            |
| Percent fat     |                                |                |                                                                    |                    |
| TNNI3K          | rs1514176                      | G              | 0.341 $\pm$ 0.214                                                  | 0.111              |
| INSIG2          | rs7566605                      | C              | 0.018 $\pm$ 0.229                                                  | 0.937              |
| PPARG           | rs1801282                      | G <sup>2</sup> | 0.243 $\pm$ 0.384                                                  | 0.527              |
| NISCH-STAB1     | rs4687617                      | G              | 0.149 $\pm$ 0.475                                                  | 0.754              |
| BDNF            | rs10767664                     | T <sup>2</sup> | -0.343 $\pm$ 0.323                                                 | 0.289              |
| BDNF            | rs6265                         | A <sup>2</sup> | -0.216 $\pm$ 0.336                                                 | 0.521              |
| BDNF            | rs1401635                      | C              | -0.220 $\pm$ 0.221                                                 | 0.321              |
| MTIF3           | rs7988412                      | A              | 0.068 $\pm$ 0.319                                                  | 0.832              |
| MAP2K5          | rs2241420                      | A              | 0.035 $\pm$ 0.215                                                  | 0.870              |
| SH2B1           | rs4788099                      | G <sup>2</sup> | -0.043 $\pm$ 0.220                                                 | 0.845              |
| FTO             | rs1421085                      | C              | 0.522 $\pm$ 0.222                                                  | 0.019 <sup>+</sup> |
| FTO             | rs3751812                      | A              | 0.427 $\pm$ 0.222                                                  | 0.054              |
| FTO             | rs9922708                      | A              | 0.242 $\pm$ 0.217                                                  | 0.264              |
| FTO             | rs9939609                      | A              | 0.323 $\pm$ 0.215                                                  | 0.132              |
| MC4R            | rs17782313                     | C              | -0.029 $\pm$ 0.254                                                 | 0.910              |
| QPCTL/GIPR      | rs11672660                     | A <sup>2</sup> | 0.104 $\pm$ 0.320                                                  | 0.745              |
| Percent protein |                                |                |                                                                    |                    |
| TNNI3K          | rs1514176                      | G              | -0.279 $\pm$ 0.089                                                 | 0.002*             |
| INSIG2          | rs7566605                      | C              | -0.145 $\pm$ 0.095                                                 | 0.126              |
| PPARG           | rs1801282                      | G <sup>2</sup> | -0.153 $\pm$ 0.095                                                 | 0.108              |
| NISCH-STAB1     | rs4687617                      | G              | 0.069 $\pm$ 0.209                                                  | 0.743              |
| BDNF            | rs10767664                     | T <sup>2</sup> | -0.118 $\pm$ 0.137                                                 | 0.392              |
| BDNF            | rs6265                         | A <sup>2</sup> | -0.151 $\pm$ 0.143                                                 | 0.293              |
| BDNF            | rs1401635                      | C              | 0.044 $\pm$ 0.093                                                  | 0.641              |
| MTIF3           | rs7988412                      | A              | 0.056 $\pm$ 0.134                                                  | 0.676              |
| MAP2K5          | rs2241420                      | A              | 0.081 $\pm$ 0.094                                                  | 0.390              |
| SH2B1           | rs4788099                      | G <sup>2</sup> | 0.012 $\pm$ 0.206                                                  | 0.953              |
| FTO             | rs1421085                      | C              | -0.148 $\pm$ 0.093                                                 | 0.111              |
| FTO             | rs3751812                      | A              | -0.155 $\pm$ 0.092                                                 | 0.092              |
| FTO             | rs9922708                      | A              | -0.169 $\pm$ 0.090                                                 | 0.061              |
| FTO             | rs9939609                      | A              | -0.153 $\pm$ 0.087                                                 | 0.079              |

|                      |             |            |                |                |       |
|----------------------|-------------|------------|----------------|----------------|-------|
|                      | MC4R        | rs17782313 | C              | 0.085 ± 0.102  | 0.404 |
|                      | QPCTL/GIPR  | rs11672660 | A <sup>2</sup> | -0.040 ± 0.131 | 0.763 |
| Percent carbohydrate |             |            |                |                |       |
|                      | TNNI3K      | rs1514176  | G              | -0.007 ± 0.232 | 0.978 |
|                      | INSIG2      | rs7566605  | C              | 0.202 ± 0.246  | 0.411 |
|                      | PPARG       | rs1801282  | G <sup>2</sup> | 0.019 ± 0.406  | 0.962 |
|                      | NISCH-STAB1 | rs4687617  | G              | -0.235 ± 0.530 | 0.658 |
|                      | BDNF        | rs10767664 | T <sup>2</sup> | 0.308 ± 0.357  | 0.389 |
|                      | BDNF        | rs6265     | A <sup>2</sup> | 0.243 ± 0.371  | 0.513 |
|                      | BDNF        | rs1401635  | C              | 0.227 ± 0.245  | 0.354 |
|                      | MTIF3       | rs7988412  | A              | 0.030 ± 0.354  | 0.932 |
|                      | MAP2K5      | rs2241420  | A              | -0.094 ± 0.246 | 0.702 |
|                      | SH2B1       | rs4788099  | G <sup>2</sup> | 0.080 ± 0.243  | 0.742 |
|                      | FTO         | rs1421085  | C              | -0.349 ± 0.241 | 0.147 |
|                      | FTO         | rs3751812  | A              | -0.261 ± 0.240 | 0.276 |
|                      | FTO         | rs9922708  | A              | -0.065 ± 0.233 | 0.778 |
|                      | FTO         | rs9939609  | A              | -0.127 ± 0.234 | 0.587 |
|                      | MC4R        | rs17782313 | C              | 0.009 ± 0.282  | 0.974 |
|                      | QPCTL/GIPR  | rs11672660 | A <sup>2</sup> | -0.092 ± 0.353 | 0.794 |

<sup>1</sup>All analyses were conducted with multivariable linear regression with statistical covariates listed in the table (N = 2075).

<sup>2</sup>As the marker minor allele frequency (MAF) fell below 20%, the rare genotype was combined with the intermediate genotype.

\*Statistical significance after correction for multiple comparisons, or  $p \leq 0.004$ .

<sup>†</sup>P values of nominal significance.

SE: standard error

Supplemental Table 2. Baseline association of the minor allele at each single nucleotide polymorphism with number of serving within each pyramid food group<sup>1</sup>.

|                                   | Closest gene | Single nucleotide polymorphism | Minor allele   | Age, sex, study site and population stratification adjusted models |                    | Age, sex, study site, population stratification and total caloric intake adjusted models |         |
|-----------------------------------|--------------|--------------------------------|----------------|--------------------------------------------------------------------|--------------------|------------------------------------------------------------------------------------------|---------|
|                                   |              |                                |                | Beta $\pm$ SE                                                      | P value            | Beta $\pm$ SE                                                                            | P value |
| PFG1: Breads, cereal, rice, pasta |              |                                |                |                                                                    |                    |                                                                                          |         |
|                                   | TNNI3K       | rs1514176                      | G              | 0.083 $\pm$ 0.052                                                  | 0.110              | 0.011 $\pm$ 0.030                                                                        | 0.712   |
|                                   | INSIG2       | rs7566605                      | C              | -0.057 $\pm$ 0.056                                                 | 0.308              | -0.024 $\pm$ 0.033                                                                       | 0.472   |
|                                   | PPARG        | rs1801282                      | G <sup>2</sup> | 0.202 $\pm$ 0.103                                                  | 0.050              | 0.048 $\pm$ 0.058                                                                        | 0.403   |
|                                   | NISCH-STAB1  | rs4687617                      | G              | 0.106 $\pm$ 0.120                                                  | 0.375              | -0.031 $\pm$ 0.069                                                                       | 0.654   |
|                                   | BDNF         | rs10767664                     | T <sup>2</sup> | -0.168 $\pm$ 0.077                                                 | 0.029 <sup>+</sup> | -0.003 $\pm$ 0.045                                                                       | 0.944   |
|                                   | BDNF         | rs6265                         | A <sup>2</sup> | -0.178 $\pm$ 0.078                                                 | 0.023 <sup>+</sup> | -0.009 $\pm$ 0.047                                                                       | 0.850   |
|                                   | BDNF         | rs1401635                      | C              | 0.004 $\pm$ 0.052                                                  | 0.937              | 0.044 $\pm$ 0.032                                                                        | 0.170   |
|                                   | MTIF3        | rs7988412                      | A              | 0.047 $\pm$ 0.078                                                  | 0.545              | 0.042 $\pm$ 0.044                                                                        | 0.340   |
|                                   | MAP2K5       | rs2241420                      | A              | -0.031 $\pm$ 0.056                                                 | 0.586              | -0.044 $\pm$ 0.032                                                                       | 0.163   |
|                                   | SH2B1        | rs4788099                      | G <sup>2</sup> | 0.000 $\pm$ 0.053                                                  | 0.996              | -0.053 $\pm$ 0.032                                                                       | 0.095   |
|                                   | FTO          | rs1421085                      | C              | 0.099 $\pm$ 0.055                                                  | 0.073              | 0.004 $\pm$ 0.031                                                                        | 0.891   |
|                                   | FTO          | rs3751812                      | A              | 0.102 $\pm$ 0.055                                                  | 0.064              | 0.009 $\pm$ 0.031                                                                        | 0.771   |
|                                   | FTO          | rs9922708                      | A              | 0.117 $\pm$ 0.053                                                  | 0.028 <sup>+</sup> | 0.027 $\pm$ 0.030                                                                        | 0.377   |
|                                   | FTO          | rs9939609                      | A              | 0.071 $\pm$ 0.053                                                  | 0.177              | -0.001 $\pm$ 0.029                                                                       | 0.970   |
|                                   | MC4R         | rs17782313                     | C              | 0.021 $\pm$ 0.058                                                  | 0.722              | -0.008 $\pm$ 0.034                                                                       | 0.826   |
|                                   | QPCTL/GIPR   | rs11672660                     | A <sup>2</sup> | -0.035 $\pm$ 0.076                                                 | 0.643              | -0.078 $\pm$ 0.045                                                                       | 0.080   |
| PFG2:<br>Vegetables               |              |                                |                |                                                                    |                    |                                                                                          |         |
|                                   | TNNI3K       | rs1514176                      | G              | 0.025 $\pm$ 0.048                                                  | 0.601              | -0.015 $\pm$ 0.042                                                                       | 0.731   |
|                                   | INSIG2       | rs7566605                      | C              | -0.093 $\pm$ 0.049                                                 | 0.059              | -0.075 $\pm$ 0.044                                                                       | 0.087   |
|                                   | PPARG        | rs1801282                      | G <sup>2</sup> | -0.023 $\pm$ 0.089                                                 | 0.793              | -0.109 $\pm$ 0.078                                                                       | 0.164   |
|                                   | NISCH-STAB1  | rs4687617                      | G              | 0.166 $\pm$ 0.110                                                  | 0.134              | 0.091 $\pm$ 0.096                                                                        | 0.344   |
|                                   | BDNF         | rs10767664                     | T <sup>2</sup> | -0.117 $\pm$ 0.070                                                 | 0.095              | -0.027 $\pm$ 0.062                                                                       | 0.669   |
|                                   | BDNF         | rs6265                         | A <sup>2</sup> | -0.121 $\pm$ 0.072                                                 | 0.093              | -0.027 $\pm$ 0.064                                                                       | 0.677   |
|                                   | BDNF         | rs1401635                      | C              | 0.027 $\pm$ 0.052                                                  | 0.596              | 0.049 $\pm$ 0.045                                                                        | 0.272   |
|                                   | MTIF3        | rs7988412                      | A              | -0.110 $\pm$ 0.069                                                 | 0.113              | -0.113 $\pm$ 0.061                                                                       | 0.065   |
|                                   | MAP2K5       | rs2241420                      | A              | 0.037 $\pm$ 0.051                                                  | 0.471              | 0.029 $\pm$ 0.045                                                                        | 0.514   |
|                                   | SH2B1        | rs4788099                      | G <sup>2</sup> | 0.092 $\pm$ 0.049                                                  | 0.058              | 0.063 $\pm$ 0.042                                                                        | 0.133   |
|                                   | FTO          | rs1421085                      | C              | 0.031 $\pm$ 0.049                                                  | 0.524              | -0.021 $\pm$ 0.043                                                                       | 0.618   |
|                                   | FTO          | rs3751812                      | A              | 0.025 $\pm$ 0.048                                                  | 0.604              | -0.026 $\pm$ 0.043                                                                       | 0.541   |
|                                   | FTO          | rs9939609                      | A              | 0.018 $\pm$ 0.047                                                  | 0.704              | -0.022 $\pm$ 0.042                                                                       | 0.598   |

|                               |             |            |                |                |                    |                |        |
|-------------------------------|-------------|------------|----------------|----------------|--------------------|----------------|--------|
|                               | FTO         | rs9922708  | A              | -0.006 ± 0.048 | 0.893              | -0.056 ± 0.043 | 0.185  |
|                               | MC4R        | rs17782313 | C              | 0.022 ± 0.053  | 0.682              | 0.006 ± 0.045  | 0.893  |
|                               | QPCTL/GIPR  | rs11672660 | A <sup>2</sup> | 0.042 ± 0.071  | 0.558              | 0.018 ± 0.061  | 0.768  |
| PFG3: Fruits                  |             |            |                |                |                    |                |        |
|                               | TNNI3K      | rs1514176  | G              | 0.022 ± 0.044  | 0.620              | -0.003 ± 0.042 | 0.938  |
|                               | INSIG2      | rs7566605  | C              | -0.041 ± 0.046 | 0.375              | -0.029 ± 0.043 | 0.497  |
|                               | PPARG       | rs1801282  | G <sup>2</sup> | 0.117 ± 0.084  | 0.163              | 0.063 ± 0.080  | 0.428  |
|                               | NISCH-STAB1 | rs4687617  | G              | 0.033 ± 0.095  | 0.727              | -0.013 ± 0.091 | 0.886  |
|                               | BDNF        | rs10767664 | T <sup>2</sup> | 0.041 ± 0.065  | 0.529              | 0.098 ± 0.062  | 0.115  |
|                               | BDNF        | rs6265     | A <sup>2</sup> | 0.005 ± 0.065  | 0.938              | 0.064 ± 0.062  | 0.301  |
|                               | BDNF        | rs1401635  | C              | -0.060 ± 0.045 | 0.178              | -0.046 ± 0.042 | 0.274  |
|                               | MTIF3       | rs7988412  | A              | 0.030 ± 0.067  | 0.651              | 0.028 ± 0.063  | 0.654  |
|                               | MAP2K5      | rs2241420  | A              | -0.059 ± 0.044 | 0.180              | -0.064 ± 0.041 | 0.123  |
|                               | SH2B1       | rs4788099  | G <sup>2</sup> | 0.061 ± 0.043  | 0.158              | 0.042 ± 0.041  | 0.297  |
|                               | FTO         | rs1421085  | C              | -0.030 ± 0.044 | 0.500              | -0.063 ± 0.042 | 0.131  |
|                               | FTO         | rs3751812  | A              | -0.024 ± 0.043 | 0.570              | -0.057 ± 0.041 | 0.165  |
|                               | FTO         | rs9922708  | A              | -0.009 ± 0.043 | 0.827              | -0.041 ± 0.041 | 0.319  |
|                               | FTO         | rs9939609  | A              | -0.012 ± 0.044 | 0.780              | -0.037 ± 0.042 | 0.373  |
|                               | MC4R        | rs17782313 | C              | 0.037 ± 0.048  | 0.440              | 0.027 ± 0.046  | 0.550  |
|                               | QPCTL/GIPR  | rs11672660 | A <sup>2</sup> | 0.068 ± 0.068  | 0.322              | 0.053 ± 0.064  | 0.410  |
| PFG4: Dairy                   |             |            |                |                |                    |                |        |
|                               | TNNI3K      | rs1514176  | G              | 0.007 ± 0.047  | 0.882              | -0.037 ± 0.040 | 0.352  |
|                               | INSIG2      | rs7566605  | C              | 0.044 ± 0.053  | 0.408              | 0.064 ± 0.045  | 0.156  |
|                               | PPARG       | rs1801282  | G <sup>2</sup> | 0.144 ± 0.100  | 0.148              | 0.049 ± 0.081  | 0.548  |
|                               | NISCH-STAB1 | rs4687617  | G              | -0.054 ± 0.107 | 0.617              | -0.138 ± 0.091 | 0.131  |
|                               | BDNF        | rs10767664 | T <sup>2</sup> | -0.226 ± 0.075 | 0.003*             | -0.124 ± 0.065 | 0.055  |
|                               | BDNF        | rs6265     | A <sup>2</sup> | -0.210 ± 0.078 | 0.007 <sup>+</sup> | -0.106 ± 0.067 | 0.115  |
|                               | BDNF        | rs1401635  | C              | -0.052 ± 0.053 | 0.325              | -0.027 ± 0.045 | 0.544  |
|                               | MTIF3       | rs7988412  | A              | 0.058 ± 0.076  | 0.447              | 0.054 ± 0.063  | 0.392  |
|                               | MAP2K5      | rs2241420  | A              | -0.014 ± 0.049 | 0.776              | -0.022 ± 0.042 | 0.596  |
|                               | SH2B1       | rs4788099  | G <sup>2</sup> | 0.165 ± 0.051  | 0.001*             | 0.132 ± 0.043  | 0.002* |
|                               | FTO         | rs1421085  | C              | 0.053 ± 0.053  | 0.316              | -0.006 ± 0.046 | 0.893  |
|                               | FTO         | rs3751812  | A              | 0.052 ± 0.053  | 0.327              | -0.006 ± 0.046 | 0.901  |
|                               | FTO         | rs9939609  | A              | 0.041 ± 0.050  | 0.422              | -0.004 ± 0.044 | 0.923  |
|                               | FTO         | rs9922708  | A              | 0.068 ± 0.050  | 0.175              | 0.012 ± 0.044  | 0.784  |
|                               | MC4R        | rs17782313 | C              | 0.009 ± 0.059  | 0.877              | -0.008 ± 0.050 | 0.868  |
|                               | QPCTL/GIPR  | rs11672660 | A <sup>2</sup> | 0.100 ± 0.076  | 0.187              | 0.073 ± 0.063  | 0.247  |
| PFG5: Meat, eggs, nuts, beans |             |            |                |                |                    |                |        |

|                       |             |            |                |                |                    |                |       |
|-----------------------|-------------|------------|----------------|----------------|--------------------|----------------|-------|
|                       | TNNI3K      | rs1514176  | G              | 0.027 ± 0.044  | 0.538              | -0.033 ± 0.028 | 0.244 |
|                       | INSIG2      | rs7566605  | C              | -0.079 ± 0.047 | 0.089              | -0.052 ± 0.029 | 0.077 |
|                       | PPARG       | rs1801282  | G <sup>2</sup> | 0.055 ± 0.091  | 0.544              | -0.074 ± 0.056 | 0.186 |
|                       | NISCH-STAB1 | rs4687617  | G              | 0.185 ± 0.105  | 0.078              | 0.072 ± 0.068  | 0.292 |
|                       | BDNF        | rs10767664 | T <sup>2</sup> | -0.154 ± 0.067 | 0.021 <sup>+</sup> | -0.016 ± 0.045 | 0.717 |
|                       | BDNF        | rs6265     | A <sup>2</sup> | -0.185 ± 0.065 | 0.004*             | -0.043 ± 0.044 | 0.324 |
|                       | BDNF        | rs1401635  | C              | -0.016 ± 0.046 | 0.730              | 0.017 ± 0.031  | 0.568 |
|                       | MTIF3       | rs7988412  | A              | -0.027 ± 0.068 | 0.693              | -0.031 ± 0.043 | 0.464 |
|                       | MAP2K5      | rs2241420  | A              | 0.029 ± 0.049  | 0.562              | 0.018 ± 0.032  | 0.585 |
|                       | SH2B1       | rs4788099  | G <sup>2</sup> | 0.021 ± 0.046  | 0.647              | -0.024 ± 0.030 | 0.426 |
|                       | FTO         | rs1421085  | C              | 0.080 ± 0.048  | 0.093              | 0.001 ± 0.031  | 0.978 |
|                       | FTO         | rs3751812  | A              | 0.071 ± 0.047  | 0.136              | -0.007 ± 0.031 | 0.824 |
|                       | FTO         | rs9922708  | A              | 0.055 ± 0.046  | 0.230              | -0.020 ± 0.029 | 0.492 |
|                       | FTO         | rs9939609  | A              | 0.070 ± 0.050  | 0.161              | 0.010 ± 0.031  | 0.756 |
|                       | MC4R        | rs17782313 | C              | 0.032 ± 0.053  | 0.549              | 0.008 ± 0.034  | 0.814 |
|                       | QPCTL/GIPR  | rs11672660 | A <sup>2</sup> | 0.048 ± 0.066  | 0.471              | 0.012 ± 0.042  | 0.780 |
| PFG6: Sweets and fats |             |            |                |                |                    |                |       |
|                       | TNNI3K      | rs1514176  | G              | 0.120 ± 0.052  | 0.022 <sup>+</sup> | 0.058 ± 0.039  | 0.140 |
|                       | INSIG2      | rs7566605  | C              | 0.030 ± 0.058  | 0.600              | 0.059 ± 0.043  | 0.170 |
|                       | PPARG       | rs1801282  | G <sup>2</sup> | 0.206 ± 0.109  | 0.058              | 0.073 ± 0.080  | 0.363 |
|                       | NISCH-STAB1 | rs4687617  | G              | 0.011 ± 0.126  | 0.930              | -0.105 ± 0.104 | 0.314 |
|                       | BDNF        | rs10767664 | T <sup>2</sup> | -0.171 ± 0.083 | 0.039 <sup>+</sup> | -0.028 ± 0.062 | 0.645 |
|                       | BDNF        | rs6265     | A <sup>2</sup> | -0.169 ± 0.085 | 0.048 <sup>+</sup> | -0.022 ± 0.064 | 0.732 |
|                       | BDNF        | rs1401635  | C              | -0.074 ± 0.055 | 0.177              | -0.040 ± 0.041 | 0.339 |
|                       | MTIF3       | rs7988412  | A              | 0.057 ± 0.082  | 0.485              | 0.053 ± 0.061  | 0.390 |
|                       | MAP2K5      | rs2241420  | A              | -0.020 ± 0.056 | 0.720              | -0.032 ± 0.044 | 0.467 |
|                       | SH2B1       | rs4788099  | G <sup>2</sup> | 0.085 ± 0.056  | 0.132              | 0.038 ± 0.042  | 0.358 |
|                       | FTO         | rs1421085  | C              | 0.128 ± 0.059  | 0.032 <sup>+</sup> | 0.045 ± 0.044  | 0.309 |
|                       | FTO         | rs3751812  | A              | 0.135 ± 0.060  | 0.024 <sup>+</sup> | 0.055 ± 0.045  | 0.218 |
|                       | FTO         | rs9922708  | A              | 0.139 ± 0.057  | 0.015 <sup>+</sup> | 0.061 ± 0.043  | 0.150 |
|                       | FTO         | rs9939609  | A              | 0.141 ± 0.057  | 0.014 <sup>+</sup> | 0.079 ± 0.042  | 0.060 |
|                       | MC4R        | rs17782313 | C              | -0.011 ± 0.063 | 0.868              | -0.035 ± 0.047 | 0.454 |
|                       | QPCTL/GIPR  | rs11672660 | A <sup>2</sup> | 0.070 ± 0.089  | 0.431              | 0.033 ± 0.064  | 0.609 |

<sup>1</sup>All analyses were conducted with multivariable linear regression with statistical covariates listed in the table (N = 2075).

<sup>2</sup>As the marker minor allele frequency (MAF) fell below 20%, the rare genotype was combined with the intermediate genotype.

\*Statistical significance after correction for multiple comparisons, or p <= 0.004.

<sup>+</sup>P values of nominal significance.

SE: standard error
